# Supplementary material
Source: publisher site journal article supplement (https://www.dovepress.com/article/213168)

Figure S1. Transfection efficiency of  miR-873-5p was examined by RT-qPCR methods. Data are represented as mean ± SEM, *** P<0.01.


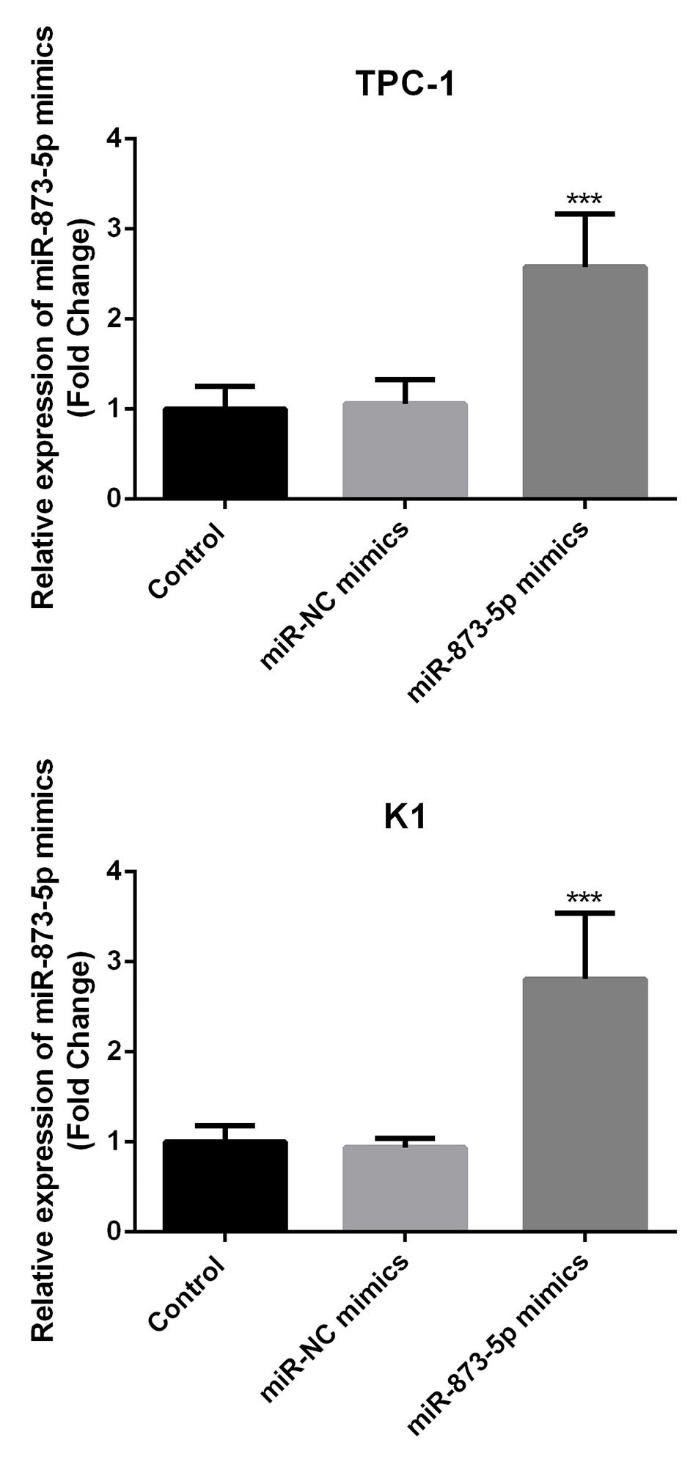

Supplement: Supplementary file 1 [file get_supplementary_file.php]
